# Supplementary material for: Using micelles for a new approach to fluorescent sensors for metal cations
Source: Royal Society of Chemistry journal article supplement (doi:10.1039/b404543b), 2004-01-01
Supplement: b404543b.doc [file b404543b.doc]

# **Electronic Supplementary Information**

for the manuscript:

title: “Using micelles for a new approach to fluorescent sensors for metal cations”

authors: Valeria Amendola, Yuri Diaz Fernandez,* Francesco Foti, Carlo Mangano, Piersandro Pallavicini* and Stefano Patroni

List of the material enclosed:

1. **Figure ESI 1:** Distribution diagram for the system Triton X-100/**C12LH2**/Ni2+, including absorbance and emission profiles
2. **Figure ESI 2:** Series of emission spectra of Pyrene for the system Triton X‑100/**C12LH2**/Pyrene/Cu2+obtained on variation of pH

**Figure ESI1** – Distribution diagram for the system Triton X-100/**C12LH2**/Ni2+, including absorbance and emission profiles

Caption: Solid lines: distribution diagram (% of species vs pH) for a water solution containing Triton X-100 (6.47 g/l), **C12LH2** (0.001M) and Ni2+(0.001M), added as Ni(CF3SO3)2). The species corresponding to each profile are indicated on the diagram. ▲: Absorbance (460 nm) vs pH for the same solution; ●: If (393 nm) vs pH for the same solution, containing also 9×10-6M pyrene

**Figure ESI2** – series of spectra for pyrene emission on varying pH, for the system Triton X‑100/**C12LH2**/Pyrene/Cu2+

Caption: Series of pyrene emission spectra for a water solution containing Triton X-100 (6.47 g/l), **C12LH2** (0.001M), Cu2+(0.001M), added as Cu(CF3SO3)2, and pyrene (9×10-6M). First spectrum (maximum If) measured at pH 2.8, last one (minimum If) at pH 10.7.
